# Supplementary material for: Controllable reconstruction of copper nanowires into nanotubes for efficient electrocatalytic nitrate conversion into ammonia
Source: Royal Society of Chemistry journal article supplement (doi:10.1039/d2nr03767j), 2022-01-01
Supplement: d2nr03767j1.pdf [file d2nr03767j1.pdf]

## Electronic Supplementary Information

### Determination of products

#### Determination of $\text{NO}_3^-$ -N:<sup>1</sup>

The collected electrolyte was diluted several times to the detection range. 100  $\mu\text{L}$  of 1 M HCl solution and 10  $\mu\text{L}$  of 0.8 wt% sulfamic acid solution were added to 5 mL of diluted electrolyte and mixed for 10 min. Then, the absorption spectrum of the mixed solution was recorded using ultraviolet-visible (UV-vis) spectrophotometry in the wavelength range of 300-200 nm. The absorbance value was corrected by the following equation:  $A=A_{220\text{nm}}-2A_{275\text{nm}}$ . A series of  $\text{KNO}_3$  standard solutions were prepared to obtain the calibration curve.

#### Determination of $\text{NO}_2^-$ -N:<sup>1</sup>

To determine the concentration of  $\text{NO}_2^-$ -N, the color reagent was first obtained through a mixed solution containing p-aminobenzenesulfonamide (0.4 g), N-(1-Naphthyl) ethylenediamine dihydrochloride (0.02 g), phosphoric acid (1 mL,  $\rho=1.70$  g/mL) and deionized water (5 mL). Then, the color reagent (100  $\mu\text{L}$ ) and the diluted electrolyte (5 mL) were mixed for 20 min. Finally, the absorption spectrum of the mixed solution was recorded using UV-vis spectrophotometry in the wavelength range of 650-450 nm. A series of  $\text{NaNO}_2$  standard solutions were prepared to obtain the calibration curve.

#### Determination of $\text{NH}_3$ -N:<sup>1</sup>

Nessler's reagent was used to determine the ammonia concentration. First, to prepare Nessler's reagent, KI (17.5 g) and  $\text{Hg}_2\text{I}$  (25.0 g) were dissolved in 4.0 M KOH solution (250 mL) and stored in the dark for 24 h. Then, potassium sodium tartrate solution (0.1 mL,  $\rho=500$  g/L) and Nessler's reagent (0.1 mL) were added to diluted electrolyte (5 mL). Finally, the absorption spectrum of  $\text{NH}_3$ -

N was recorded using UV-vis spectrophotometry in the wavelength range of 530-380 nm. The calibration curve was obtained by using a series of standard NH<sub>4</sub>Cl solutions.

### Isotope Labeling Experiments

K<sup>15</sup>NO<sub>3</sub> (99%) was used as the feeding nitrogen source to perform the isotopic labeling experiments to clarify the source and quantify the concentration of ammonia-N. After electroreduction for 2 h in 0.5 M K<sub>2</sub>SO<sub>4</sub> solution containing 50 mg L<sup>-1</sup> K<sup>15</sup>NO<sub>3</sub>-<sup>15</sup>N. The post-electrolysis electrolyte was collected and the pH value was adjusted to weak acid by 4 M H<sub>2</sub>SO<sub>4</sub>. The <sup>15</sup>NH<sub>4</sub><sup>+</sup>-<sup>15</sup>N concentration was quantified by <sup>1</sup>H NMR with external standard of maleic acid (C<sub>4</sub>H<sub>4</sub>O<sub>4</sub>). First, various amounts of <sup>15</sup>NH<sub>4</sub><sup>+</sup>-<sup>15</sup>N (10, 20, 30, 40, 50 mg L<sup>-1</sup>) were dissolved in 0.5 M K<sub>2</sub>SO<sub>4</sub> with 50 mg L<sup>-1</sup> C<sub>4</sub>H<sub>4</sub>O<sub>4</sub> as a standard solution. Then, 50 μL of deuterium oxide (D<sub>2</sub>O) was mixed with 0.5 mL of the acidified electrolyte or standard solution to obtain further <sup>1</sup>H NMR spectra by the NMR detection.

### Calculation of the conversion rate, yield, selectivity, and Faradaic efficiency

The calculation equation is as follows:

$$\text{Conversion} = \Delta c_{\text{NO}_3^-} / c_0 \times 100\% \quad (1)$$

$$\text{Yield}_{\text{NH}_3} = (c_{\text{NH}_3} \times V) / (M_{\text{NH}_3} \times t \times m) \quad (2)$$

$$\text{Selectivity (NH}_3) = c_{\text{NH}_3} / \Delta c_{\text{NO}_3^-} \times 100\% \quad (3)$$

$$\text{Selectivity (NO}_2^-) = c_{\text{NO}_2^-} / \Delta c_{\text{NO}_3^-} \times 100\% \quad (4)$$

$$\text{Faradaic efficiency} = (8F \times c_{\text{NH}_3} \times V) / (M_{\text{NH}_3} \times Q) \quad (5)$$

Where  $\Delta c_{\text{NO}_3^-}$  is the concentration difference of NO<sub>3</sub><sup>-</sup> before and after reduction,  $c_0$  is the initial concentration of NO<sub>3</sub><sup>-</sup>,  $c_{\text{NH}_3}$  is the measured NH<sub>3</sub> concentration, V is the electrolyte volume in the cathode chamber (35 mL),  $t$  is the electrolysis time (2 h),  $M_{\text{NH}_3}$  is the molar mass of NH<sub>3</sub>,  $m$  is the catalyst mass (1 mg),  $c_{\text{NO}_2^-}$  is the concentration of NO<sub>2</sub><sup>-</sup>,  $F$  is the Faraday constant (96 485 C mol<sup>-1</sup>), and  $Q$  is the total charge during electrolysis.

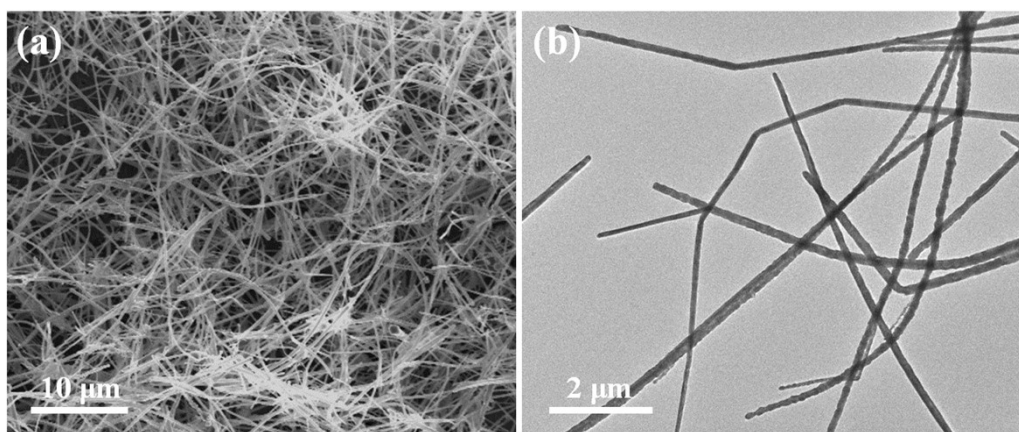

**Fig. S1** SEM (a), and TEM (b) images of the Cu nanowires.

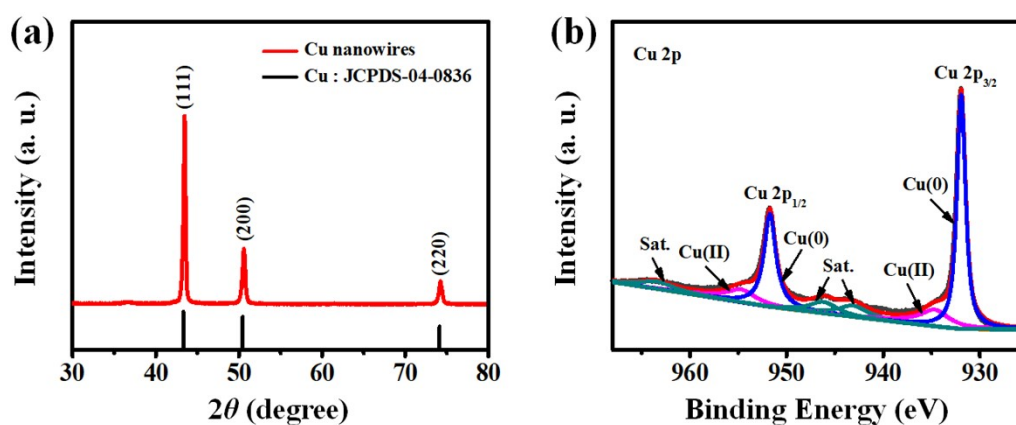

**Fig. S2** XRD pattern (a), and high-resolution XPS spectrum of Cu 2p (b) for Cu nanowires.

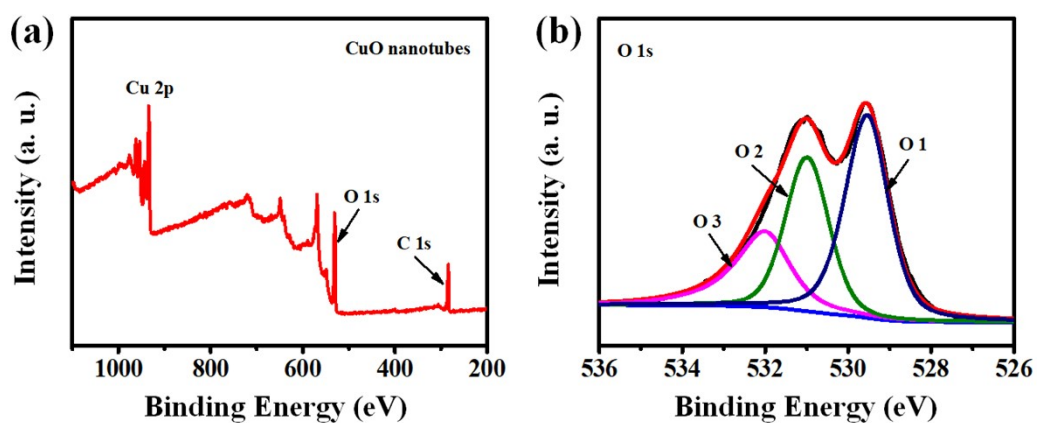

**Fig. S3** (a) XPS spectra of the CuO nanotubes. (b) High-resolution XPS spectra of O 1s for CuO nanotubes.

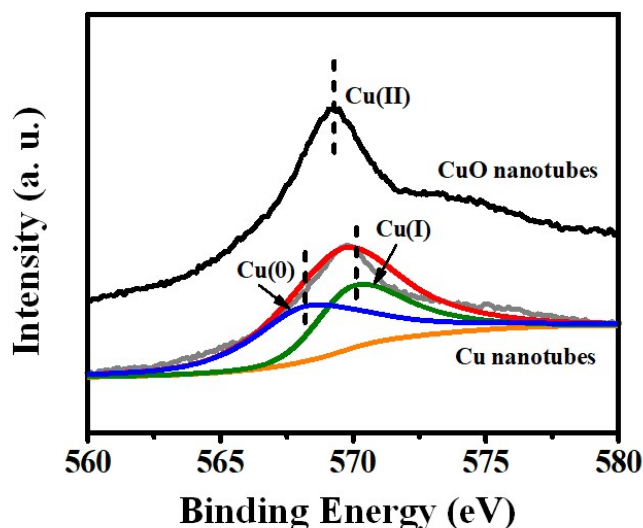

Fig. S4 Cu LMM AES spectra of CuO nanotubes and Cu nanotubes.

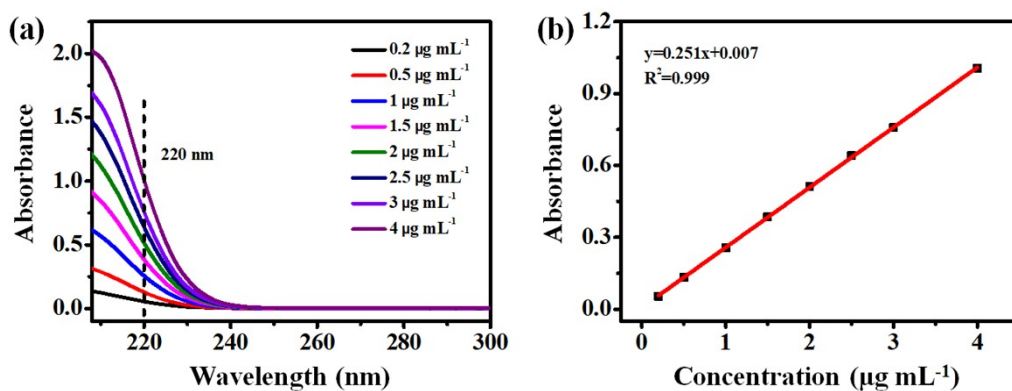

Fig. S5 (a) UV-vis absorption spectroscopy for various concentrations of  $\text{NO}_3^-$ -N. (b) The concentration-absorbance calibration curve of  $\text{NO}_3^-$ -N.

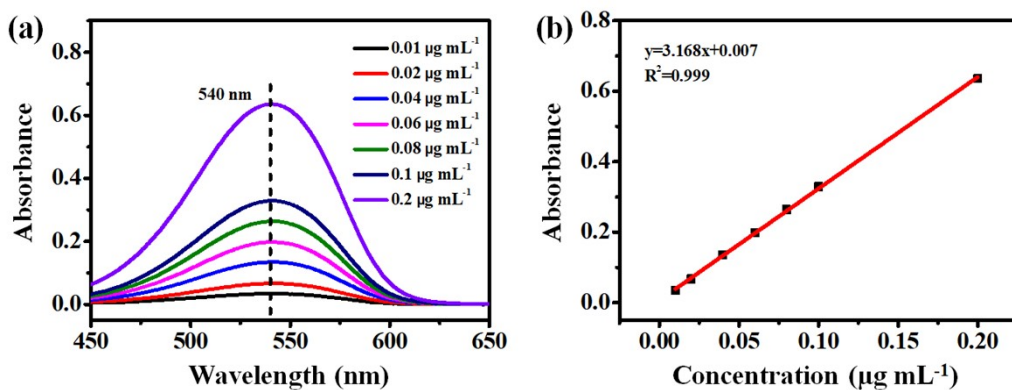

Fig. S6 (a) UV-vis absorption spectroscopy for various concentrations of  $\text{NO}_2^-$ -N. (b) The concentration-absorbance calibration curve of  $\text{NO}_2^-$ -N.

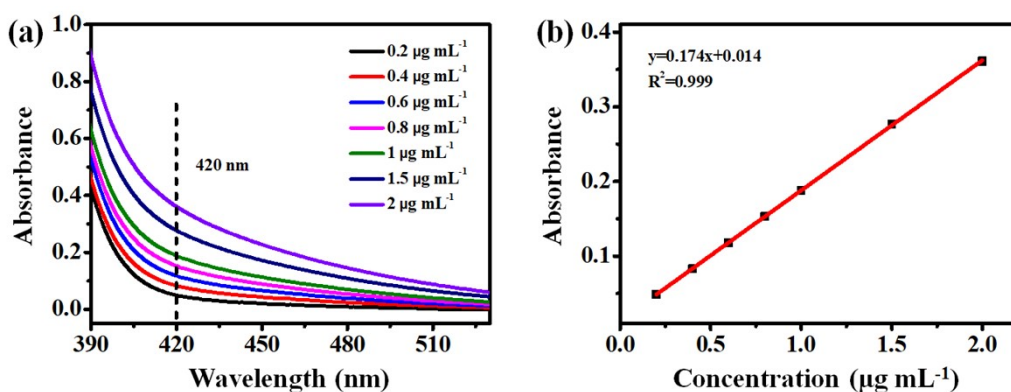

**Fig. S7** (a) UV-vis absorption spectroscopy for various concentrations of  $\text{NH}_3\text{-N}$ . (b) The concentration-absorbance calibration curve of  $\text{NH}_3\text{-N}$ .

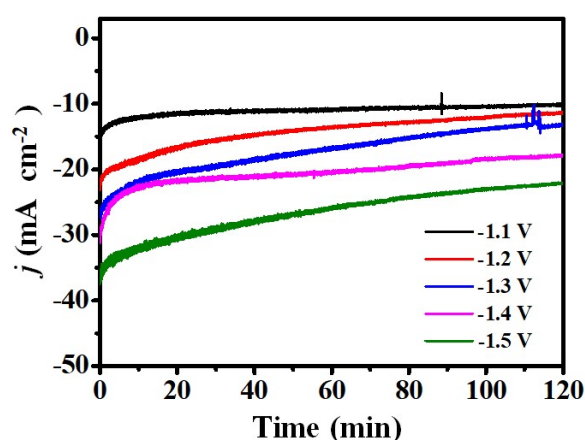

**Fig. S8** Chronoamperometric measurements of Cu nanotubes at various potentials in 0.5 M  $\text{K}_2\text{SO}_4$  solution containing 50 ppm  $\text{NO}_3^-\text{-N}$ .

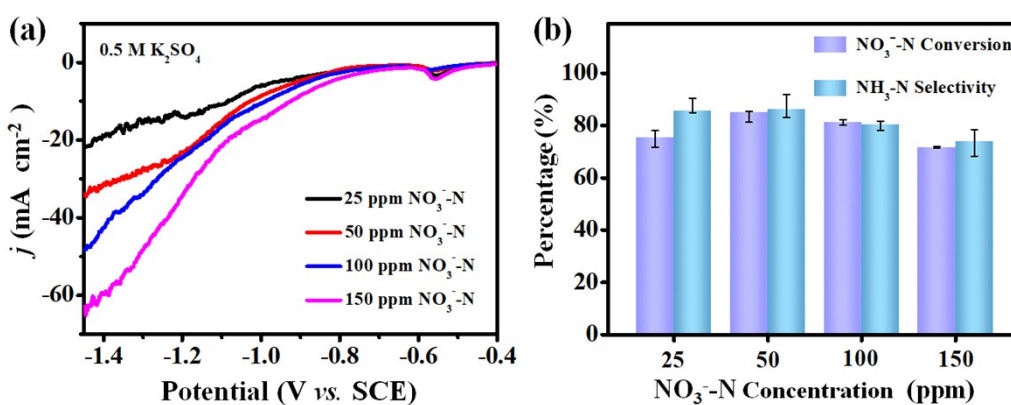

**Fig. S9** (a) LSV curves for Cu nanotubes with different concentration of nitrate. (b) The comparisons of  $\text{NO}_3^-\text{-N}$  conversion rate and  $\text{NH}_3\text{-N}$  selectivity for Cu nanotubes at different nitrate concentrations.

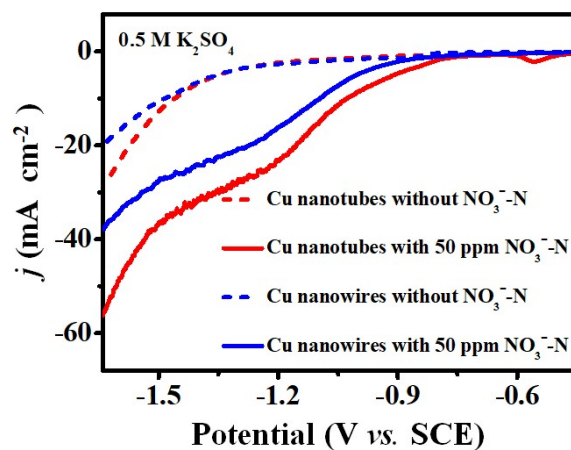

**Fig. S10** LSV curves of Cu nanotubes and Cu nanowires.

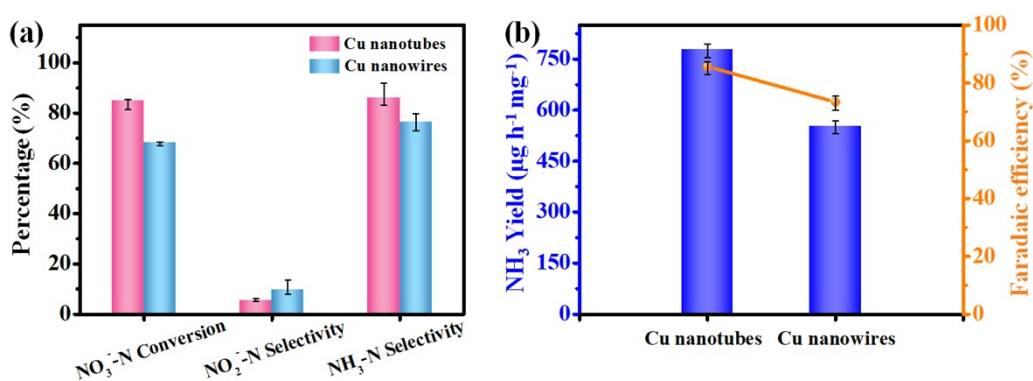

**Fig. S11** (a) The comparisons of NO<sub>3</sub><sup>-</sup>-N conversion rate, NO<sub>2</sub><sup>-</sup>-N selectivity, and NH<sub>3</sub>-N selectivity between Cu nanotubes and Cu nanowires. (b) NH<sub>3</sub> yield rate and Faradaic efficiency of Cu nanotubes and Cu nanowires at -1.3 V vs. SCE for 2 h.

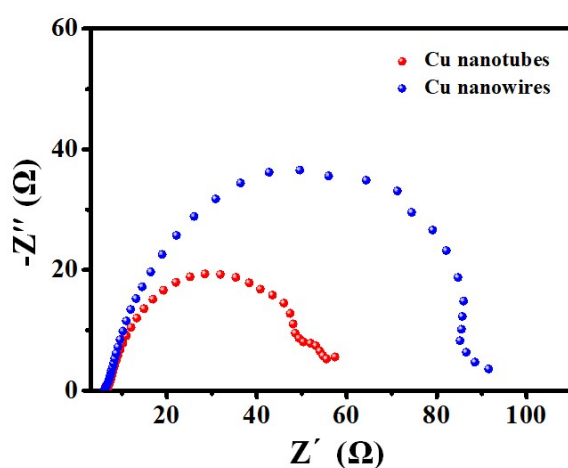

**Fig. S12** Nyquist plots for Cu nanotubes and Cu nanowires recorded at -1.2 V (vs. SCE) in 0.5 M K<sub>2</sub>SO<sub>4</sub> solution. The frequency ranges from 100 kHz to 0.1 Hz.

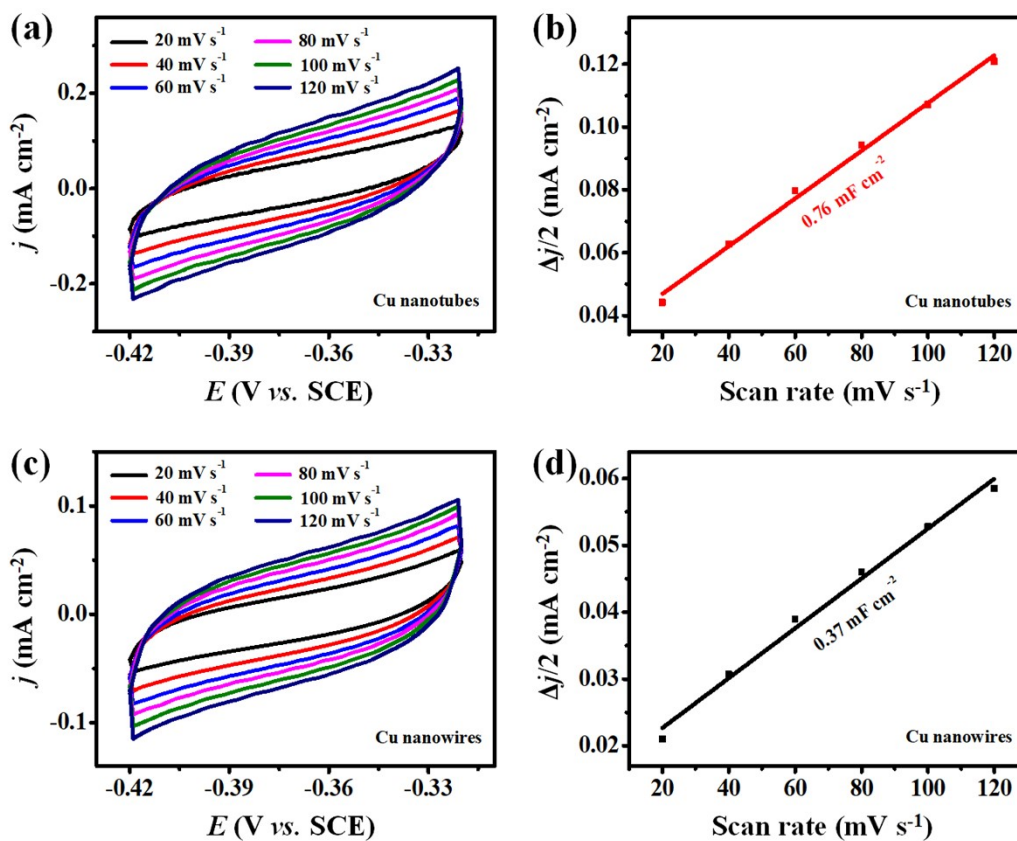

**Fig. S13** Cyclic voltammograms for (a) Cu nanotubes and (c) Cu nanowires recorded with various scan rates in 0.5 M K<sub>2</sub>SO<sub>4</sub> solution. Capacitive current densities at -0.37 V (vs. SCE) derived from CVs against scan rates for (b) Cu nanotubes, and (d) Cu nanowires.

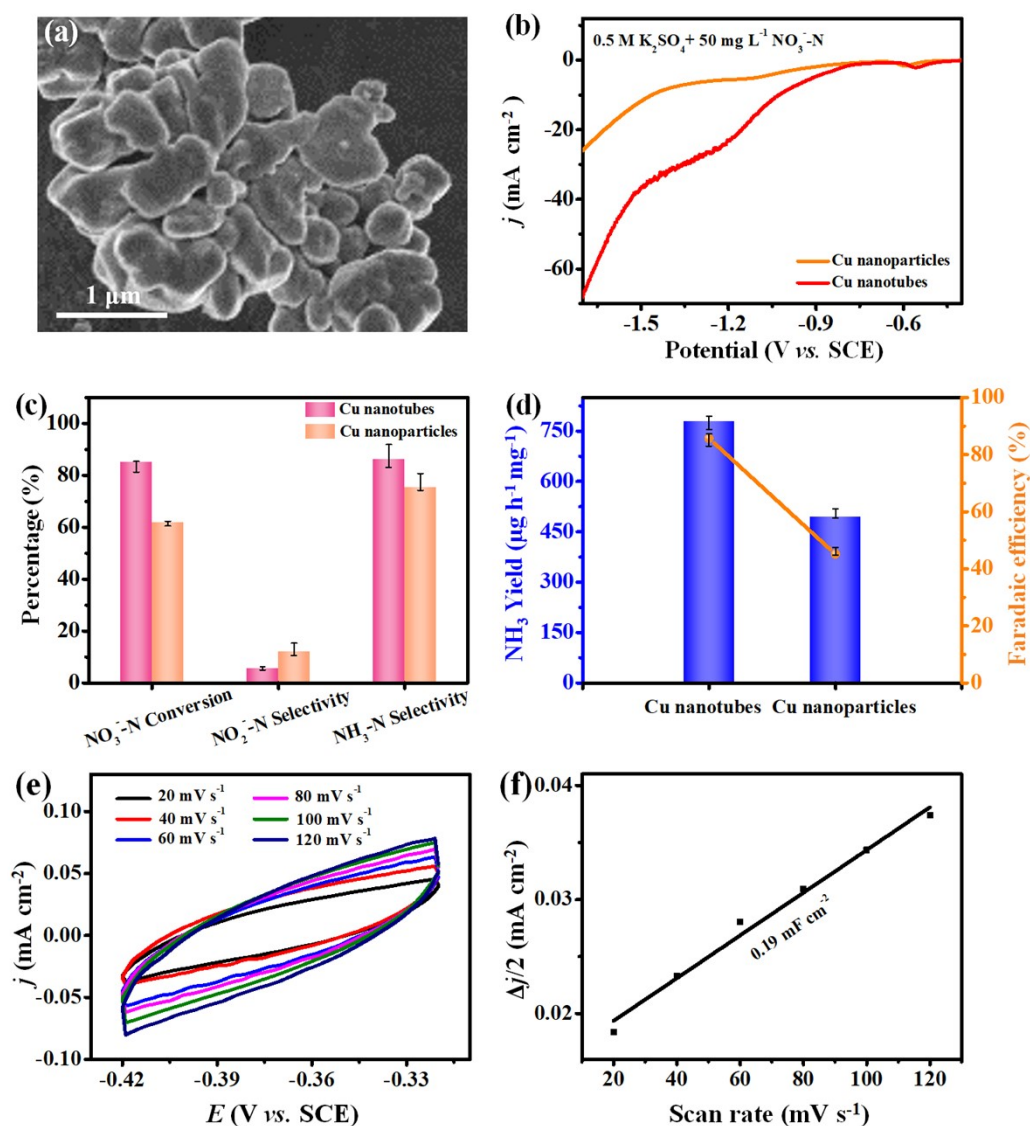

**Fig. S14** (a) SEM image for Cu nanoparticles. (b) LSV curves of Cu nanotubes and Cu nanoparticles. (c) The comparisons of  $\text{NO}_3^- \text{-N}$  conversion rate,  $\text{NO}_2^- \text{-N}$  selectivity, and  $\text{NH}_3 \text{-N}$  selectivity between Cu nanotubes and Cu nanoparticles. (d)  $\text{NH}_3$  yield rate and Faradaic efficiency of Cu nanotubes and Cu nanoparticles at -1.3 V vs. SCE for 2 h. (e) Cyclic voltammograms recorded with various scan rates in 0.5 M  $\text{K}_2\text{SO}_4$  solution, and (f) capacitive current densities at -0.37 V (vs. SCE) derived from CVs against scan rates for Cu nanoparticles.



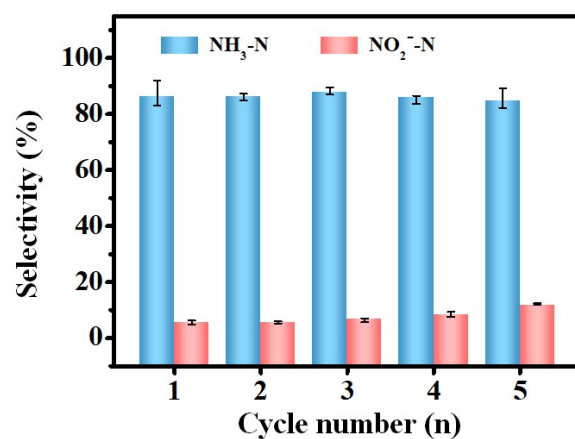

**Fig. S15** Selectivity of NH<sub>3</sub>-N and NO<sub>2</sub><sup>-</sup>-N for Cu nanotubes after continuous cycling test at -1.3 V vs. SCE.

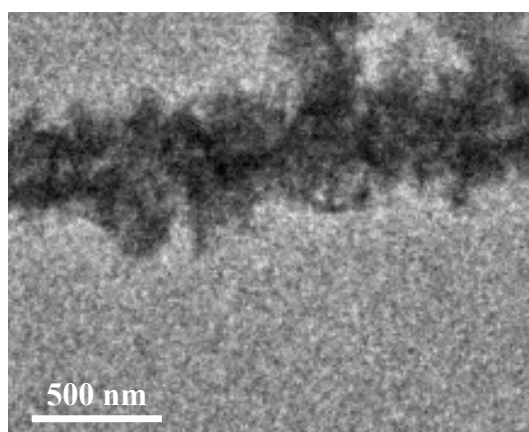

**Fig. S16** TEM image of Cu nanotube after stability test.

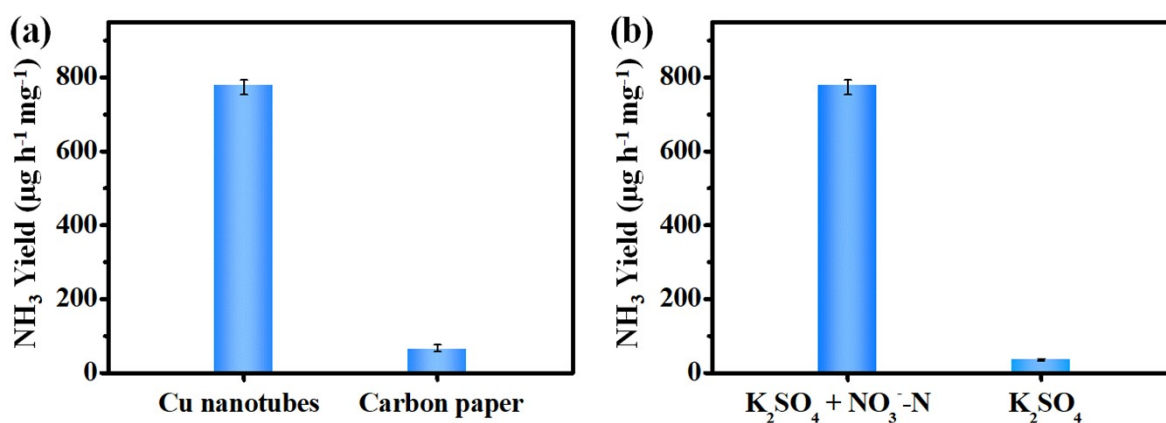

**Fig. S17** (a) NH<sub>3</sub> yield rates of the Cu nanotubes and carbon paper at -1.3 V. (b) NH<sub>3</sub> yield rates of the Cu nanotubes in 0.5 M K<sub>2</sub>SO<sub>4</sub> solution with and without 50 mg L<sup>-1</sup> NO<sub>3</sub><sup>-</sup>-N.

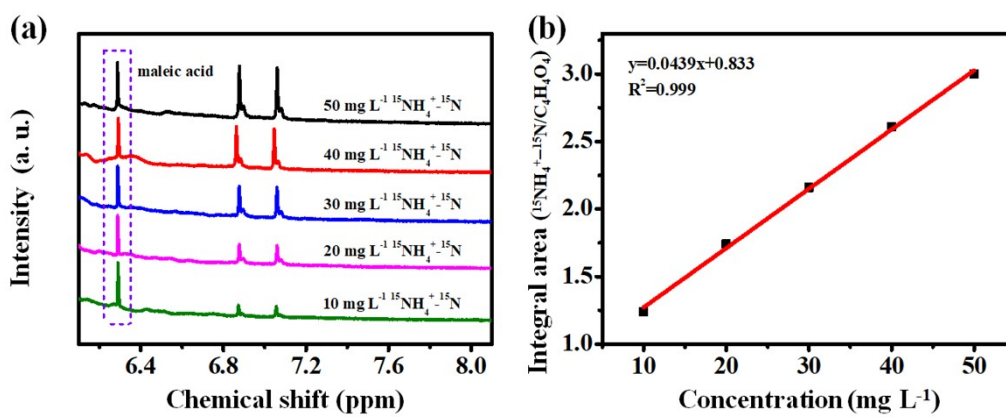

**Fig. S18** (a) The  $^1\text{H}$  NMR spectra of  $^{15}\text{NH}_4^+$  with different  $^{15}\text{NH}_4^+-^{15}\text{N}$  concentration. (b) The standard curve of integral area ( $^{15}\text{NH}_4^+-^{15}\text{N} / \text{C}_4\text{H}_4\text{O}_4$ ) against  $^{15}\text{NH}_4^+-^{15}\text{N}$  concentration.

**Table S1.** Comparisons of the NO<sub>3</sub>RR performance for Cu nanotubes with recently reported catalysts.

| Catalysts                         | Electrolyte                                                                      | Potential                                      | NH <sub>3</sub> yield                                      | FE           | NH <sub>3</sub> -N selectivity | Ref.             |
|-----------------------------------|----------------------------------------------------------------------------------|------------------------------------------------|------------------------------------------------------------|--------------|--------------------------------|------------------|
| <b>Cu nanotubes</b>               | <b>0.5 M K<sub>2</sub>SO<sub>4</sub> + 50 ppm NO<sub>3</sub><sup>-</sup>-N</b>   | <b>-1.3 V vs. SCE</b>                          | <b>778.6 μg h<sup>-1</sup> mg<sup>-1</sup></b>             | <b>85.7%</b> | <b>86.2%</b>                   | <b>This work</b> |
| Cu nanosheets                     | 0.1 M KOH + 10 mM KNO <sub>3</sub>                                               | -0.15 V vs. RHE                                | 390.1 μg h <sup>-1</sup> mg <sub>cat.</sub> <sup>-1</sup>  | 99.7%        | --                             | 2                |
| Cu@Cu <sub>2+1</sub> O NWs        | 0.5 M K <sub>2</sub> SO <sub>4</sub> + 50 ppm NO <sub>3</sub> <sup>-</sup> -N    | -1.2 V vs. SCE                                 | 576.53 μg h <sup>-1</sup> mg <sub>cat.</sub> <sup>-1</sup> | 87.07%       | 76%                            | 3                |
| Cu-PTCDA                          | 0.1 M PBS + 500 ppm KNO <sub>3</sub>                                             | -0.4 V vs. RHE                                 | 436 ± 85 μg h <sup>-1</sup> cm <sup>-2</sup>               | 85.9%        | --                             | 4                |
| Ir nanotubes                      | 0.1 M HClO <sub>4</sub> + 1 M NaNO <sub>3</sub>                                  | 0.06 V vs. RHE                                 | 921 μg h <sup>-1</sup> mg <sub>cat.</sub> <sup>-1</sup>    | 84.7%        | --                             | 5                |
| Cu/GO/Ti                          | 0.05 M Na <sub>2</sub> SO <sub>4</sub> + 50 mg/L NO <sub>3</sub> <sup>-</sup> -N | At the current of 0.05 A                       | --                                                         | --           | 50.37%                         | 6                |
| Cu/rGO/graphite plate             | 0.02 M NaCl + 0.02 M NaNO <sub>3</sub>                                           | -1.4 V vs. SCE                                 | --                                                         | --           | 29.93%                         | 7                |
| Cu/Ni composite electrodes        | 0.1 M Na <sub>2</sub> SO <sub>4</sub> + 50 ppm NO <sub>3</sub> <sup>-</sup> -N   | At a constant current of 3 mA cm <sup>-2</sup> | --                                                         | --           | 83.2%                          | 8                |
| Ag <sub>27</sub> Ni <sub>73</sub> | 1 M NaOH + 20 mM NaNO <sub>3</sub>                                               | -1.3 V vs. SCE                                 | --                                                         | --           | 77.8%                          | 9                |

## References

1. Y. Wang, W. Zhou, R. Jia, Y. Yu and B. Zhang, *Angew. Chem. Int. Ed.*, 2020, **59**, 5350-5354.
2. X. Fu, X. Zhao, X. Hu, K. He, Y. Yu, T. Li, Q. Tu, X. Qian, Q. Yue, M. R. Wasielewski and Y. Kang, *Appl. Mater. Today*, 2020, **19**, 100620.
3. T. Ren, K. Ren, M. Wang, M. Liu, Z. Wang, H. Wang, X. Li, L. Wang and Y. Xu, *Chem. Eng. J.*, 2021, **426**, 130759.
4. G.-F. Chen, Y. Yuan, H. Jiang, S.-Y. Ren, L.-X. Ding, L. Ma, T. Wu, J. Lu and H. Wang, *Nat. Energy*, 2020, **5**, 605-613.
5. J. Y. Zhu, Q. Xue, Y. Y. Xue, Y. Ding, F. M. Li, P. Jin, P. Chen and Y. Chen, *ACS Appl. Mater. Interfaces*, 2020, **12**, 14064-14070.
6. J. Wang, S. Wang, Z. Zhang and C. Wang, *J. Environ. Manage.*, 2020, **276**, 111357.
7. D. Yin, Y. Liu, P. Song, P. Chen, X. Liu, L. Cai and L. Zhang, *Electrochim. Acta*, 2019, **324**, 134846.
8. Y.-J. Shih, Z.-L. Wu, Y.-H. Huang and C.-P. Huang, *Chem. Eng. J.*, 2020, **383**, 123157.
9. L. Mattarozzi, S. Cattarin, N. Comisso, N. El Habra, P. Guerriero, M. Musiani and L. Vázquez-Gómez, *Electrochim. Acta*, 2020, **346**, 136240.
